# Supplementary material for: Printed Electronics in RF and Microwave Circuits: A Performance Comparison Analysis
Source: Research Square preprint supplement (doi:10.21203/rs.3.rs-7054978/v1), 2025-07-17
Supplement: Supplementary file 1 [file 7ae40e93dde28ffabfddd540.docx]

**Supplementary files**

**Overview of the Microstrip Structure and Printing Setup**

A standard microstrip structure consists of three main layers: a conductive ground plane at the bottom, a dielectric substrate in the middle, and a signal-carrying conductive strip (layout) on the topS1.
**I. Dispenser Printing (Direct Write)**

The Direct-Write (DW) printing process utilizes a Nordson EFD ProPlus 4L/A pneumatic robotic 3-axis system, which provides precise control throughout the printing procedure. A flexible and stretchable paste based on silver micro-particles, DuPont PE 874, is the conductor. The process is systematically divided into several stages to ensure consistency and accuracy in every printed layer. It begins with the deposition of the ground (GND) layer, which serves as the base for the microstrip structure. For this step, a printing pressure of 2.6 bar, a speed of 20 mm/s, and a 200 µm dispense tip are employed. The use of a 200 µm dispense tip accelerates the process and ensures a uniform conductive surface, regardless of the substrate type. Following the GND layer, the next stage involves printing the strip layer, which includes both the contour and interior of the resonator. The process starts with defining the resonator's contour. It is a critical step for achieving the desired dimensions. During this phase, the optimal combination of a 0.22 bar printing pressure, 20 mm/s printing speed, and a 150 µm dispenser tip is used to ensure precise line formation. Once the contour is completed, the interior filling phase begins. In this step, the printing pressure is slightly increased to guarantee uniform and complete filling, while maintaining the same printing speed and dispense tip size. This adjustment helps prevent over-deposition and ensures dimensional accuracy. The resolution of printing with the described setup is 300 µm of line width. The success of the DW process relies heavily on careful optimization of parameters such as speed, pressure, and nozzle size across each stage of printing.

**II. Screen Printing (SP)**

The Ekra E2 semi-automatic screen printer is employed for fabricating the microstrip circuit structures. This printing method is well-suited for producing planar RF components due to its cost-effectiveness, scalability, and compatibility with a wide range of conductive inks and substrates. Two screen meshes were used based on the requirements of different circuit elements. A 200-mesh screen was applied for printing the ground (GND) layer, where its larger apertures allow for the deposition of thicker conductive layers. After printing, the ground layer is cured at 130 °C for 30 minutes in a preheated laboratory oven to ensure adhesion and conductivity.

For the microstrip patterns, a 400-mesh screen was selected to enable higher-resolution printing and better feature definition. Once printed, the resonator layer undergoes the same curing process (130 °C for 30 minutes) to secure structural integrity and optimal electrical performance. Several process parameters are optimized to ensure high print fidelity. A squeegee with a hardness of 85 Shore A is used to maintain sharp pattern edges and uniform ink transfer. The squeegee angle was set at 45°, striking a balance between efficient ink deposition and precise pattern control. The printing speed is fixed at 170 mm/s, a value determined to provide consistent coverage while minimizing defects such as smearing or incomplete transfer. A squeegee force of 25 N is applied to ensure even pressure distribution across the substrate. Additionally, a snap-off distance of 1.5 mm is maintained between the screen and substrate, allowing the screen to lift cleanly after each pass, which helps preserve the integrity of the printed features.

**III. Aerosol Jet Printing (AJP)**

The Aerosol Jet Printing (AJP) process is performed using the Optomec AJ300 system. This advanced technology enables printing fine patterns and microstructures with excellent precision, making it ideal for complex designs on various substrates. AJP is a high-precision, non-contact printing method that converts liquid ink into a fine aerosol mist, which is then directed onto the substrate. The process involves three main steps: atomization, where liquid ink is broken into tiny droplets forming a uniform aerosol mist; transport, where a carrier gas carries the aerosol to the print nozzle; and focusing and deposition, where a sheath gas concentrates the aerosol stream into a tight beam for precise printing.

The fabrication process follows similar steps to those used in screen printing and direct-write methods. It is important to note that the GND layer is printed using screen printing (SP) technology because SP is faster, more material-efficient, and time-saving for covering the large, simple area of the GND layer. Additionally, the method used to print the GND layer has no significant effect on the frequency responses. The GND layer printed by SP shares similar printing parameters and curing conditions with the direct-write (DW) process, including curing at 130 °C for 30 minutes. The microstrip layer is printed using Ag nanoparticle ink (Sicrys I160PM-116), chosen for its compatibility with AJP and ability to produce fine, detailed patterns essential for high-performance electronics. The process employs a pneumatic atomizer, a 400 µm nozzle diameter, and maintains a print head distance of 7.17 mm from the substrate. The printing plate temperature is set to 30 °C to ensure consistent ink flow and good adhesion. After printing, the ink is cured at 150 °C for 120 minutes to solidify the material and enhance electrical and mechanical properties.

**Port assembling**
The assembly of input and output SMA connectors onto the printed resonators is a crucial part of the fabrication process. The chosen approach must accommodate the unique properties of the conductive pastes used and avoid potential damage from traditional soldering methods. The conductive pastes used in this study are based on a polymeric matrix combined with a conductive filler. Traditional soldering is unsuitable because the high temperatures involved can degrade the polymeric matrix, compromising the structural integrity and electrical performance of the printed resonators. Moreover, common soldering compounds can cause silver diffusion, which may alter the properties of the conductive paste and affect the overall performance. For substrates like PET foil, soldering can also damage the material due to its sensitivity to high temperatures. To address these challenges, the SMA connectors were assembled using the same conductive paste, DuPont PE 874, which is also employed for direct write printing. This method, known as wet assembly, involves applying the conductive paste through a dispenser nozzle syringe to connect the SMA connectors to the printed structure as seen in Fig. S1.

[Figure S1 here]

This approach acts as an electrically conductive adhesive, ensuring that the connectors are securely attached without subjecting the printed resonator to high temperaturesS2. The process involves fixing the SMA connector to the edge of the substrate using a UV-curable dielectric adhesive. This adhesive is cured using a UVET NSC4 UV curing station with a wavelength of 365 nm for 30 seconds, with a UV intensity of 5.6 W/cm². Then they are electrically connected to both the ground layer and the resonator layer using the same ink paste used for DW printing. The electrical connections are cured again by the raised temperature of 130 °C for 30 minutes to ensure robust and reliable contact between the SMA ports and the printed layers. A similar wet assembly technique has been demonstrated in previous studiesS3 as a reliable method for producing low-loss connections, which supports its application in this work.

**Performance Characteristics of Typical RF/Microwave Substrates**Table S1, provides a comparative overview of several widely used rigid and flexible substrate materials with respect to their dielectric properties, including dielectric constant (εr) and loss tangent (tanδ), measured at both low and high microwave frequencies. The data were collected from manufacturers’ technical datasheets and relevant literature. The PET foil (Mylar A) used in this study is also included for reference. This comparison highlights the influence of substrate properties on circuit performance above 10 GHz and supports the discussion presented in the main text.

Table. S1: Comparison of commonly used substrate materials in RF and microwave applications.

| **Substrate** | **Type** | **Dielectric Constant (εr)** | **Frequency Dependency of (εr)** | **Loss Tangent (tanδ)** | **Frequency Dependency of (tanδ)** | **Suitable Frequency Range** |
| --- | --- | --- | --- | --- | --- | --- |
| **Rogers 4003CS4** | Rigid | ~3.38 | Slightly decreases as frequency increases | ~0.0027 | Remains low and stable | Up to 10 GHz, ideal for RF/microwave |
| **Rogers 3003S5** | Rigid | ~3.0 | Very stable across frequencies | ~0.0013 | Very low loss, stable | Suitable for high-frequency microwave/mmWave |
| **PET (Mylar A)S6** | Flexible | ~2.8 | Varies slightly but relatively stable | ~0.005–0.01 | Increases with frequency, leading to higher losses | Best for low-frequency applications, not ideal for high-frequency RF |
| **Kapton (Polyimide)S7** | Flexible | ~3.4 | Stable across frequencies | ~0.002–0.004 | Increases with frequency but lower than PET | Used in flexible electronics, moderate RF applications |
| **LCP (Liquid Crystal Polymer)S8** | Flexible | ~3.0 | Very stable across high frequencies | ~0.0025 | Very low loss, stable | Excellent for mmWave (5G, radar, flexible RF circuits) |

**Analysis of skin effect:**
At high frequencies, the skin effect becomes a dominant factor influencing conductor performance. It limits the effective cross-sectional area for current flow by forcing the current toward the outer surface of the conductor, thereby increasing resistance and loss. This phenomenon is particularly significant in printed electronics, where the conductor thickness may vary considerably depending on the fabrication method. Table S2 summarizes the estimated skin depth values and their relation to conductor thicknesses achieved through various techniques, such as Direct Writing (DW), Screen Printing (SP) and Aerosol Jet Printing (AJP). The analysis highlights how thicker conductors, like those achieved in DW, can better accommodate the skin effect, resulting in lower RF losses, while thinner conductors (e.g., in AJP) are more adversely affected.

Table. S2: Analysis of skin effect for various printing technologies. (δ: Skin depth for silver)

| **Technology** | **Height (µm)** | **Width (µm)** | **Area (µm2)** | **𝛿 at 1 GHz (2.01 µm)** | **𝛿 at 10 GHz (0.63 µm)** | **𝛿 at 20 GHz (0.45 µm)** | **Loss Analysis** |
| --- | --- | --- | --- | --- | --- | --- | --- |
| **DW (Direct Write)** | 8.66 | 312.60 | 1738.61 | Entire conductor used (Low loss) | Mostly surface (Moderate loss) | Mostly surface  (High loss) | Best performance due to thick conductor and lower resistive losses. |
| **SP (Screen Printing)** | 7.16 | 316.48 | 1459.72 | Entire conductor used (Low loss) | Mostly surface  (Moderate loss) | Mostly surface (High loss) | Slightly worse than DW, but still performs well. |
| **AJP (Aerosol Jet Printing)** | 2.86 | 332.53 | 863.38 | Entire conductor used (Moderate loss) | Mostly surface (High loss) | Mostly surface  (Even higher loss) | More resistive loss due to smaller conductive volume. |

**References**

1. Hong, H. J. & Lancaster, M. J. *Microstrip Filters for RF/Microwave Applications*. Vol. **7** *Wiley,* (2011).
2. Lotfi, S., Janda, M. & Blecha, T. Study of flexible printed transmission lines realized by direct-write printing technology. In *2023 46th International Spring Seminar on Electronics Technology (ISSE)* 1–5 (2023).
3. Cherukhin, I., Gao, S. P. & Guo, Y. Fully flexible polymer-based microwave devices: materials, fabrication technique, and application to transmission lines. *IEEE Trans. Antennas Propag.* **69**, 8763–8777 <https://doi.org/10.1109/TAP.2021.3083855> (2021).
4. Rogers Corporation. Rogers RO4000 Laminates Data Sheet. <https://www.mclpcb.com/wp-content/uploads/2021/05/Rogers-ro4000-laminates-ro4003c-and-ro4350b-data-sheet.pdf>
5. Rogers Corporation. RO3003 Laminates. <https://www.rogerscorp.com/advanced-electronics-solutions/ro3000-series-laminates/ro3003-laminates>
6. Ekotech. Mylar A – Electrical Properties. <https://converting-tasm.pl/wp-content/uploads/2024/01/info-mylar-a-electrical-properties_ekotech_2023.pdf>
7. DuPont. Kapton® HN Data Sheet. <https://www.dupont.com/content/dam/electronics/amer/us/en/electronics/public/documents/en/EI-10206-Kapton-HN-Data-Sheet.pdf>
8. Celanese Corporation. *Vectra LCP Design Guide*. <https://www.celanese.com/-/media/Engineered%20Materials/Files/Product%20Technical%20Guides/LCP-027_VectraLCPDesignGuideTG_AM_0613.pdf>

**Figure Legends**
Fig. S1: Assembling SMA connectors.
